1           **Parkinson's disease-associated alterations of the gut microbiome can**  
2                           **invoke disease-relevant metabolic changes**

3

4 Federico Baldini<sup>1\*</sup>, Johannes Hertel<sup>2,3\*</sup>, Estelle Sandt<sup>4</sup>, Cyrille C. Thinnès<sup>1,2</sup>, Lorieza  
5 Neuberger-Castillo<sup>4</sup>, Lukas Pavelka<sup>1,5</sup>, Fay Betsou<sup>4</sup>, Rejko Krüger<sup>1,5,6</sup>, Ines Thiele<sup>1,2,7</sup> # on  
6 behalf of the NCER-PD Consortium

7

8 \* These authors contributed equally.

9

10 <sup>1</sup> Luxembourg Centre for Systems Biomedicine, University of Luxembourg, Campus Belval,  
11 Esch-sur-Alzette, Luxembourg.

12 <sup>2</sup> School of Medicine, National University of Ireland, Galway, Ireland.

13 <sup>3</sup> Department of Psychiatry and Psychotherapy, University Medicine Greifswald, Greifswald,  
14 Germany.

15 <sup>4</sup> Integrated BioBank of Luxembourg, 1, Rue Louis Rech, 3555 Dudelange, Luxembourg

16 <sup>5</sup> Parkinson Research Clinic, Centre Hospitalier de Luxembourg (CHL), Luxembourg

17 <sup>6</sup> Transversal Translational Medicine, Luxembourg Institute of Health (LIH), Luxembourg

18 <sup>7</sup> Discipline of Microbiology, School of Natural Sciences, National University of Ireland,  
19 Galway, Ireland.

20

21 # email: [ines.thiele@nuigalway.ie](mailto:ines.thiele@nuigalway.ie)

22

23

24

25 **ABSTRACT**

26

27 Parkinson's disease (PD) is a systemic disease clinically defined by the degeneration of  
28 dopaminergic neurons in the brain. While alterations in the gut microbiome composition have  
29 been reported in PD, their functional consequences remain unclear. Herein, we first analysed  
30 the gut microbiome of patients and healthy controls by 16S rRNA gene sequencing of stool  
31 samples from the Luxembourg Parkinson's study (n=147 typical PD cases, n=162 controls).  
32 All individuals underwent detailed clinical assessment, including neurological examinations  
33 and neuropsychological tests followed by self-reporting questionnaires. Second, we predicted  
34 the potential secretion for 129 microbial metabolites through personalised metabolic modelling  
35 using the microbiome data and genome-scale metabolic reconstructions of human gut  
36 microbes. Our key results include: 1. eight genera and nine species changed significantly in  
37 their relative abundances between PD patients and healthy controls. 2. PD-associated microbial  
38 patterns statistically depended on sex, age, BMI, and constipation. The relative abundances of  
39 *Bilophila* and *Paraprevotella* were significantly associated with the Hoehn and Yahr staging  
40 after controlling for the disease duration. In contrast, dopaminergic medication had no  
41 detectable effect on the PD microbiome composition. 3. Personalised metabolic modelling of  
42 the gut microbiomes revealed PD-associated metabolic patterns in secretion potential of nine  
43 microbial metabolites in PD, including increased methionine and cysteinylglycine. The  
44 microbial pantothenic acid production potential was linked to the presence of specific non-  
45 motor symptoms and attributed to individual bacteria, such as *Akkermansia muciniphila* and  
46 *Bilophila wardswarthia*. Our results suggest that PD-associated alterations of gut microbiome  
47 could translate into functional differences affecting host metabolism and disease phenotype.

48

49

## 50 INTRODUCTION

51           Parkinson's Disease (PD) is a complex multifactorial disease, with both genetic and  
52 environmental factors contributing to the evolution and progression of the disease (Kalia et al.  
53 2015). While several studies have elucidated the role of genetic factors in the pathogenesis of  
54 the disease (Kitada et al. 1998; Bonifati et al. 2003; Paisan-Ruiz et al. 2004; Di Fonzo et al.  
55 2009), the role and the contribution of various environmental and lifestyle factors are still not  
56 completely understood (Gatto et al. 2010). Importantly, about 60% of the PD patients suffer  
57 from constipation (Fasano et al. 2015), which can start up to 20 years before the diagnosis and  
58 is one of the prodromal syndromes (Savica et al. 2009; Cersosimo et al. 2013).

59           The human being is considered to be a superorganism recognising a complex interplay  
60 between the host and microbes (Sleator 2010). For instance, the human gut microbiome has  
61 been shown to complement the host with essential functions (trophic, metabolic, protective)  
62 and to influence the host's central nervous system (CNS) via the gut-brain axis through the  
63 modulation of neural pathways and GABAergic and serotonergic signalling systems  
64 (Carabotti et al. 2015).

65           Recent studies have reported an altered gut composition in PD (Hasegawa et al. 2015;  
66 Keshavarzian et al. 2015; Scheperjans et al. 2015; Bedarf et al. 2017; Hill-Burns et al. 2017;  
67 Hopfner et al. 2017; Petrov et al. 2017; Heintz-Buschart et al. 2018; Barichella et al. 2019).  
68 One of these studies has been conducted using samples from recently diagnosed, drug-naive  
69 patients (Bedarf et al. 2017). These studies have demonstrated that PD patients have an altered  
70 microbiome composition, compared to age-matched controls. However, the functional  
71 implications of the altered microbiome remain to be elucidated, e.g., using animal models  
72 (Sampson et al. 2016). A complementary approach is computational modelling, or constraint-  
73 based reconstruction and analyses (COBRA) (Orth et al. 2010), of microbiome-level  
74 metabolism. In this approach, metabolic reconstructions for hundreds of gut microbes

75 (Magnusdottir et al. 2017) are combined based on microbiome data (Baldini et al. 2018;  
76 Heirendt et al. 2019)). Flux balance analysis (FBA) (Orth et al. 2010) is then used to compute,  
77 e.g., possible metabolite uptake or secretion flux rates of each microbiome model (microbiome  
78 metabolic profile) (Heinken et al. 2019) or to study of microbial metabolic interactions (cross-  
79 feedings) (Klitgord and Segre 2010; Heinken and Thiele 2015). This approach has been applied  
80 to various microbiome data sets to gain functional insights (Thiele et al. 2018; Heinken et al.  
81 2019; Hertel et al. in revision), including for PD where we propose that microbial sulphur  
82 metabolism could contribute to changes in the blood metabolome of PD patients (Hertel et al.  
83 in revision).

84 In the present study, we aim at investigating microbial changes associated with PD  
85 while focusing on possible covariates influencing microbial composition and at proposing  
86 functional, i.e., metabolic, consequences arising from the microbiome changes. First, we  
87 analysed the faecal microbial composition of PD patients and controls from the Luxembourg  
88 Parkinson's study (Hipp et al. 2018) (Figure 1). Second, based on the observed significant  
89 differences in the composition of microbial communities between PD patients and controls, we  
90 created and interrogated personalised computational models representing the metabolism of  
91 each individual's microbial community. We demonstrate that the combined microbial  
92 composition and functional metabolite analysis provides novel hypotheses on microbial  
93 changes associated with PD and disease severity, enabling future mechanism-based  
94 experiments.

95

## 96 **RESULTS**

97 The Luxembourg Parkinson's Disease study includes patients with typical PD and  
98 atypical parkinsonism, as well as matched healthy control subjects from Luxembourg and its  
99 neighbouring regions from a broad age-range (Hipp et al. 2018). For the present study, we

100 focused on typical PD patients and healthy controls over the age of 50 (Table 1, Methods).  
101 Stool samples were analysed for 147 PD patients and 162 controls using 16S rRNA gene  
102 sequences (Methods: Analysis of the microbial composition with 16S rRNA gene sequencing).  
103

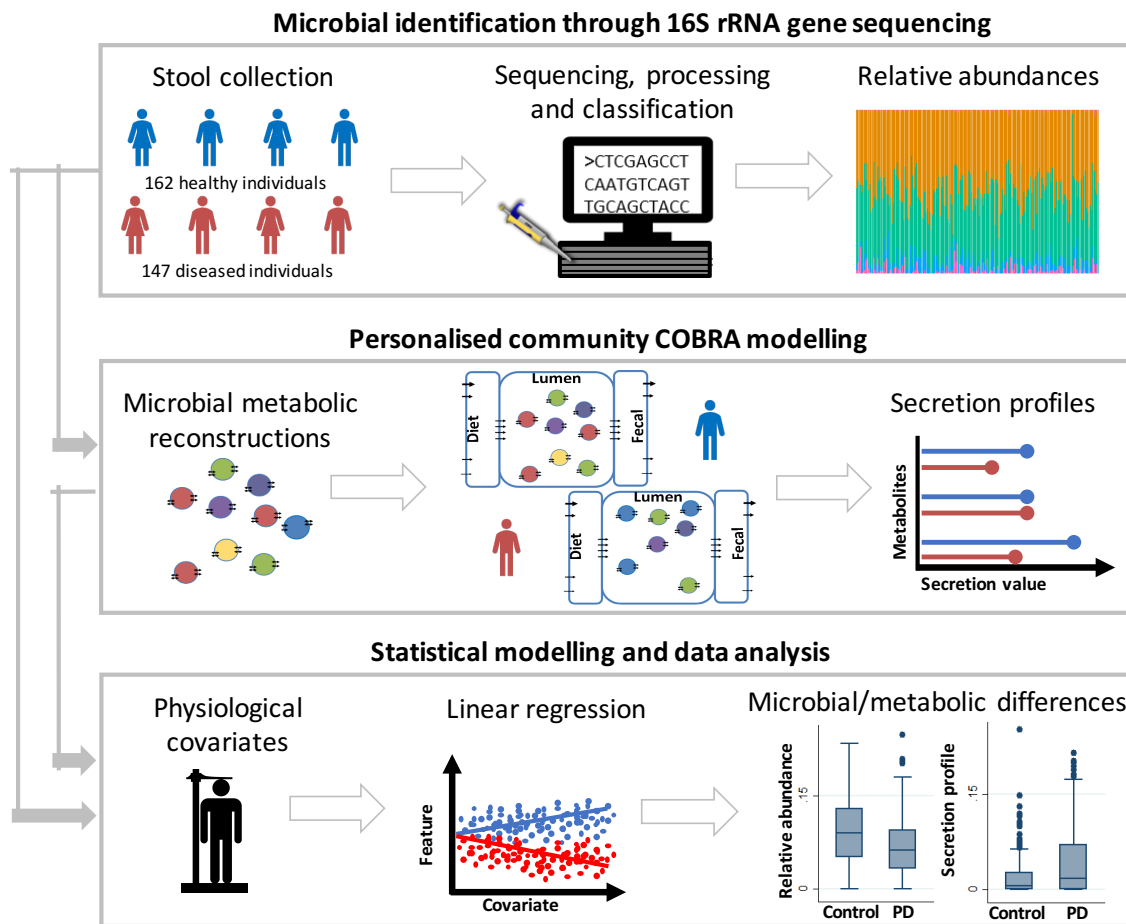

104

105 **Figure 1: Overview of the study approach and the key methods used.** Relative abundances  
106 were derived from 16S rRNA gene sequences (Methods: Analysis of the microbial composition  
107 with 16S rRNA gene sequencing) and used as input for the personalised community modelling  
108 to simulate metabolites secretion profiles. Relative abundances and secretion profiles were  
109 statistically analysed to identify microbial or metabolic differences between PD patients and  
110 controls.

111

112

| Variable                                            | PD         | Control    | Missing values, in % |         | Genera influenced by PD-covariate interaction effects (FDR<0.05) | Genera associated with trait (up/down, FDR<0.05)                                                                                                          | NMPCs associated with trait (up/down, FDR<0.05)                                                                    |
|-----------------------------------------------------|------------|------------|----------------------|---------|------------------------------------------------------------------|-----------------------------------------------------------------------------------------------------------------------------------------------------------|--------------------------------------------------------------------------------------------------------------------|
|                                                     |            |            | PD                   | Control |                                                                  |                                                                                                                                                           |                                                                                                                    |
| Cases vs. Controls                                  | 147        | 162        | 0%                   | 0%      | --                                                               | <i>Anaerotruncus</i> , <i>Christensenella</i> , <i>Lactobacillus</i> , <i>Streptococcus</i> , <i>Akkermansia</i> , <i>Bilophila</i> , <i>Turicibacter</i> | D-alanine, Oxalate, D-Mannitol, Cysteinylglycine, L-Methionine, L-alanine, D-Ribose, 4Hydroxybenzoic acid, Uracil, |
| Sex (female subjects)                               | 31.5 %     | 35.8%      | 0%                   | 0%      | <i>Paraprevotella</i>                                            | --                                                                                                                                                        | --                                                                                                                 |
| Age at basic assessment <sup>a</sup>                | 69.3 ± 8.6 | 63.3 ± 8.3 | 0%                   | 0%      | <i>Anaerotruncus</i> , <i>Roseburia</i>                          | --                                                                                                                                                        | Phosphate, Glycine                                                                                                 |
| Body mass index <sup>a</sup>                        | 27.3 ± 4.5 | 27.9 ± 4.8 | 0.7%                 | 0%      | <i>Paraprevotella</i>                                            | <i>Victivallis</i>                                                                                                                                        | --                                                                                                                 |
| Sniff score <sup>a</sup>                            | 7.1 ± 3.4  | 12.7 ± 2.1 | 0%                   | 0%      | --                                                               | --                                                                                                                                                        | --                                                                                                                 |
| Metabolic diabetes                                  | 4.1 %      | 3.1%       | 0%                   | 0%      | --                                                               | --                                                                                                                                                        | --                                                                                                                 |
| Non-motor symptoms questionnaire score <sup>a</sup> | 9.3 ± 5.1  | 3.9 ± 3.9  | 9.5%                 | 3.7%    | --                                                               | ---                                                                                                                                                       | Pantothenate                                                                                                       |
| Constipated                                         | 36.7%      | 6.2 %      | 0%                   | 0%      | <i>Bifidobacterium</i>                                           | <i>Bifidobacterium</i>                                                                                                                                    | Xanthine, D-Alanine, Pantothenate, L-Lactate, D-Ribose                                                             |
| PD disease duration                                 | 5.9 ± 5.7  | --         | 6.1%                 | --      | --                                                               | <i>Lactobacillus</i>                                                                                                                                      | --                                                                                                                 |
| UPDRS-part I                                        | 10.0 ± 5.9 | 4.5 ± 4.4  | 3.4%                 | 3.1%    | --                                                               | --                                                                                                                                                        | --                                                                                                                 |
| UPDRS-part II                                       | 11.8 ± 8.1 | 1.3 ± 2.8  | 1.4%                 | 2.4%    | --                                                               | --                                                                                                                                                        | --                                                                                                                 |
| UPDRS-part III                                      | 34.6± 16.1 | 2.3± 2.9   | 1.4%                 | 0%      | --                                                               | <i>Peptococcus</i> , <i>Flavonifractor</i> , <i>Paraprevotella</i>                                                                                        | --                                                                                                                 |
| UPDRS-part IV                                       | 1.7 ± 3.2  | --         | 1.4%                 | --      | --                                                               | --                                                                                                                                                        | --                                                                                                                 |
| Hoehn and Yahr                                      | 2.2 ± 0.6  | --         | 0%                   | --      | --                                                               | <i>Bilophila</i> , <i>Paraprevotella</i>                                                                                                                  | --                                                                                                                 |
| L-DOPA intake                                       | 66.7%      | 0%         | 0%                   | 0%      | --                                                               | --                                                                                                                                                        | --                                                                                                                 |
| Dopamine agonist intake                             | 56.5%      | 0%         | 0%                   | 0%      | --                                                               | --                                                                                                                                                        | --                                                                                                                 |
| MAO-B COMT inhibitors intake                        | 41.5%      | 0%         | 0%                   | 0%      | --                                                               | --                                                                                                                                                        | --                                                                                                                 |

113 **Table 1: Descriptive statistics of the analyses sample from the Luxembourg Parkinson's**

114 **Disease study and overview over associations.** A red label means increased in PD, blue  
115 decreased in PD, while -- “nothing to report”. PD disease duration refers to time since diagnosis  
116 at the date of stool sampling. UPDRS=Unified Parkinson Rating Scale, L-DOPA=levodopa,  
117 MAO-B=monoaminoxidase B, COMT=Catecholamine-Methyl-Transferase, NMPC=Net  
118 maximal production capability.

119

## 120 **Species and genus level changes in PD microbiomes**

121 We investigated disease-associated microbial changes at the species level. We found  
122 that the mean species diversity (i.e., the alpha-diversity) did not significantly differ between  
123 PD cases and controls (b=-0.04351, 95%-CI:(-.107;0.177), p=0.177), in agreement with earlier  
124 studies (Scheperjans et al. 2015; Bedarf et al. 2017) (Hopfner et al. 2017), but in disagreement

125 with two other studies (Keshavarzian et al. 2015; Heintz-Buschart et al. 2018). However, seven  
126 species were significantly altered in PD (FDR<0.05, Figure 2). Note that when comparing  
127 results between different taxonomic levels, changes observed for *Ruminococcus* and *Roseburia*  
128 species were not significant on the genus level but only on the species level, highlighting the  
129 importance of species-level resolution. The highest effect size was associated with  
130 *Akkermansia muciniphila* (Odds ratio (OR)=1.80, 95%-CI=(1.29, 2.51), p=6.02e-04,  
131 FDR<0.05; Supplementary Table 1) in agreement with the previously reported higher  
132 abundance of *A. muciniphila* in PD patients (Bedarf et al. 2017; Heintz-Buschart et al. 2018)).  
133 Subsequently, we examined possible differences at the genus level by performing  
134 semiparametric fractional regressions while adjusting for age, sex, the body mass index (BMI),  
135 batch, and total read counts. We identified eight genera to be significantly increased in PD  
136 (FDR<0.05; Figure 3A, Table 1), with *Lactobacillus* showing the highest effect size (Odds  
137 ratio (OR)=5.75, 95%-CI=(2.29, 14.45), p=1.96e-04, FDR<0.05; Supplementary Table 2). In  
138 contrast, the genera *Turicibacter* decreased significantly in PD cases (FDR<0.05). To  
139 summarise, significant changes could be observed on the species and genus level.

140

#### 141 **PD modifies the effects of basic covariates on the microbiome**

142 Furthermore, we investigated whether the genus level alterations in PD were affected  
143 by basic confounding factors. This interaction analyses uncovered rich effect modifications,  
144 revealing that microbiome changes in PD have to be considered in the context of age, BMI,  
145 and gender. Our analyses demonstrate that the effects of PD are not homogeneous among  
146 important sub-groups of patients. For example, *Paraprevotella* was exclusively reduced in  
147 female patients but not in female controls (Figure 3B), highlighting gender-dependent  
148 alterations of microbial communities in PD. In addition, the effects of BMI and age were  
149 modified in PD cases. The PD cases had increased *Anaerotruncus* abundance with age, while

150 non-linear, overall decreasing abundances of *Roseburia* and *Paraprevotella* were observed  
151 with age and BMI, respectively (Figure 3C). Taken together, these analyses suggest that  
152 microbial abundances are shifted in PD cases and that also the effects of important covariates  
153 were altered in PD, reflecting the systemic and complex nature of PD.  
154

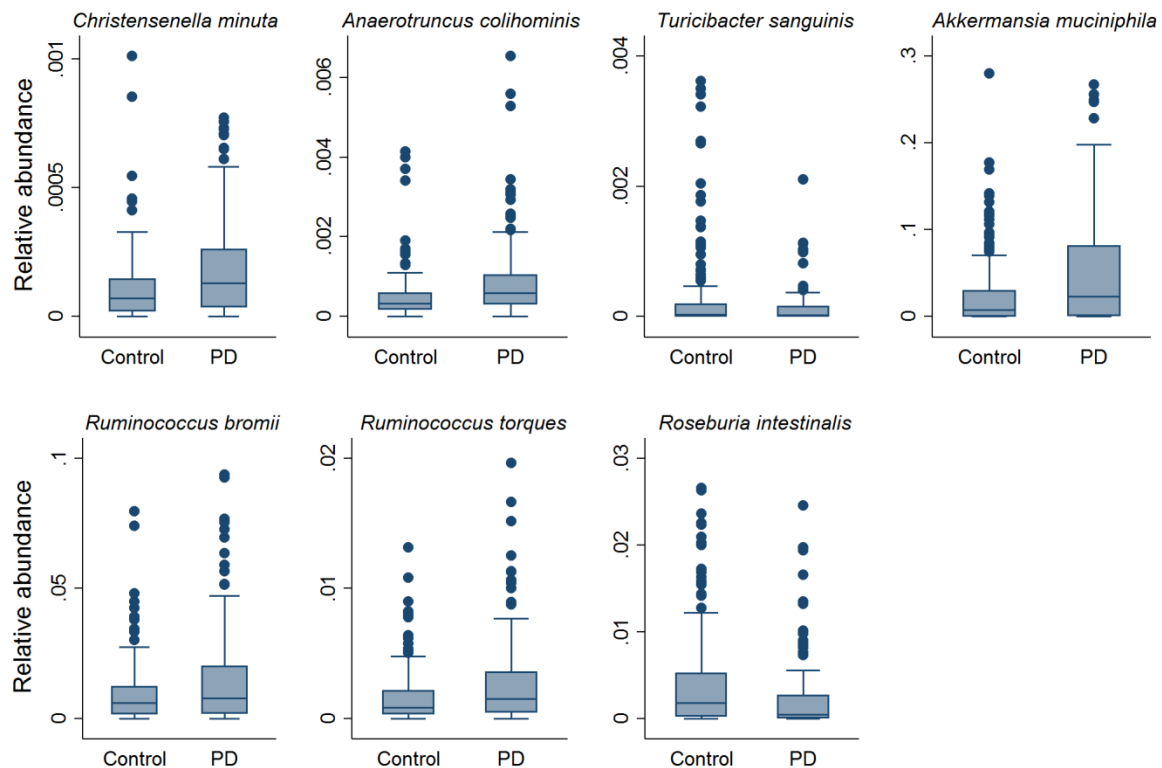

all FDR<0.05

155  
156 **Figure 2: Boxplots of seven significantly changed species in PD versus controls**  
157 (FDR<0.05). Significance levels were determined using multivariable semi-parametrical  
158 fractional regressions with the group variable (PD vs. control) as predictor of interest, including  
159 age, gender, BMI, and technical variables (i.e., total read-counts and batch effect) as covariates.  
160 FDR=false discovery rate.



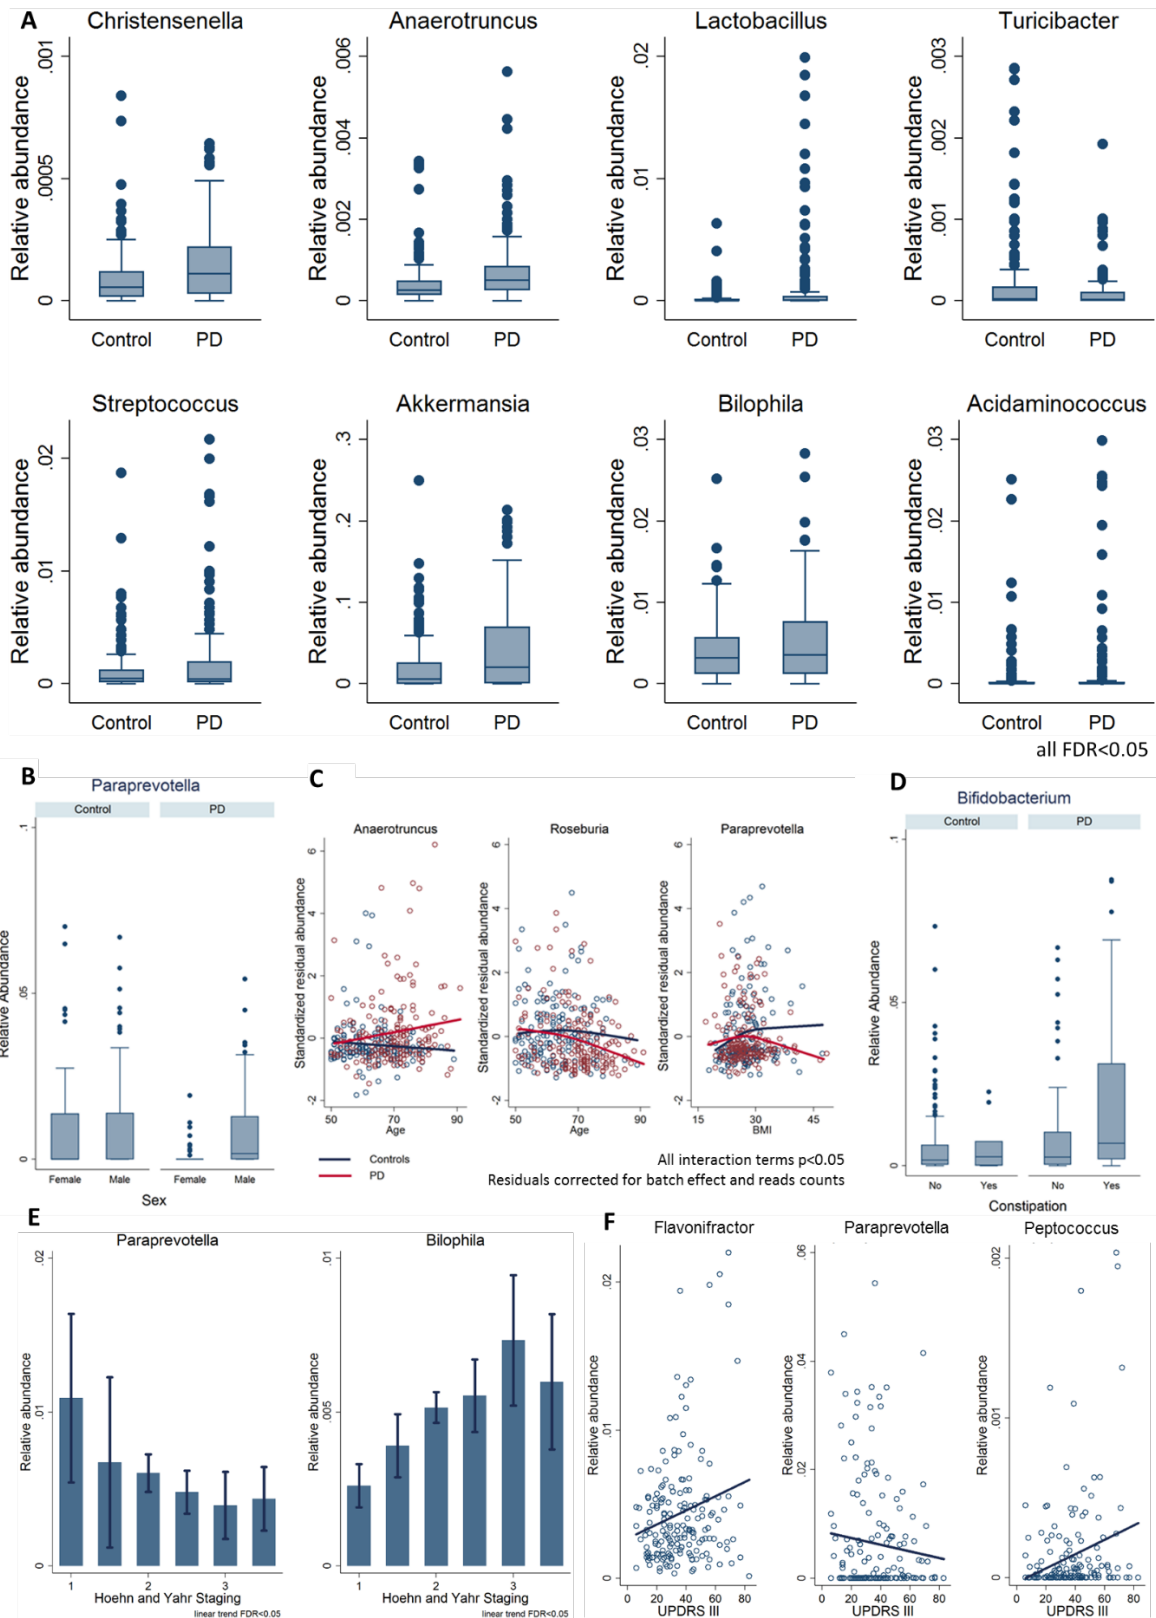

161

162 **Figure 3: Genus alterations in PDs due to interactions with basic covariates. Relative**

163 abundance is given on a logarithmic scale. **A.** Boxplots of the seven significant species

164 (**FDR<0.05**). **B.** Female PD patients have a reduced abundance of *Paraprevotella* (**FDR<0.05**).

165 C. Genus abundance age and BMI dependencies of *Anaerotruncus*, *Roseburia*, and  
166 *Paraprevotella* (global test on all interaction terms, FDR<0.05). For graphical assessment of  
167 the interaction terms the z-transformed residual abundances are displayed after correction for  
168 technical covariates (batch and read counts). D. The genus relative abundance of  
169 *Bifidobacterium* was increased in patients reporting to be constipated (FDR<0.05). E. Genus  
170 association with disease staging showed a decrease of relative abundance of *Paraprevotella*  
171 and an increase of *Bilophila* genus over increasing Hoehn and Yahr scale values (FDR<0.05).  
172 F. An increased score in motor symptoms (UPDRS III) was associated with an increased trend  
173 in abundances of *Flavonifractor* and *Peptococcus* and a decreased trend in *Paraprevotella*  
174 abundance (FDR<0.05). UPDRS=Unified Parkinson Rating Scale, BMI=body mass index,  
175 FDR=false discovery rate.

176

### 177 **Microbial abundances, medication intake, and constipation in PD**

178 The Luxembourg Parkinson's study enrolls patients of all stages of PD. Therefore, the  
179 patients have considerable inter-individual variance in PD-related features, such as constipation  
180 and intake of medication (Table 1). We analysed whether these features had an impact the  
181 microbiome composition in PD. In our data, we could not find any evidence for an effect of the  
182 three medication types on the microbiome, i.e., levodopa, COMT inhibitors, or MAO-B  
183 inhibitors, when correcting for multiple testing (Supplementary Table 2). In contrast,  
184 constipation, a prevalent non-motor symptom in PD patients (Lesser 2002), was associated  
185 with an increased abundance of *Bifidobacterium*, with a clear effect in constipated PD cases  
186 (Figure 3D). However, since there were only ten constipated controls (Table 1), these results  
187 must be confirmed in larger cohorts.

188

189

## 190 **Genus association with the disease severity**

191 We next investigated whether the stage of the disease, i.e., defined by Hoehn and Yahr  
192 staging, NMS, and UPDRS (Unified Parkinson Rating Scale) scores, and its subscales, was  
193 associated with altered genus abundance. For the Hoehn and Yahr staging, *Paraprevotella*  
194 showed a negative association and *Bilophila* showed a positive association, both of which were  
195 significant after multiple testing (Figure 3E). For the UPDRS III subscale score (i.e., motor  
196 symptoms, Table 1), three genera, being *Peptococcus*, *Flavonifractor*, and *Paraprevotella*,  
197 survived correction for multiple testing (Figure 3F). In contrast, the other UPDRS subscales  
198 and the NMS were not significantly associated with microbial changes, after correction for  
199 multiple testing. Note that these analyses were performed while adjusting for disease duration.  
200 When analysing the association pattern of disease duration, we found *Lactobacillus* positively  
201 correlated with the disease duration (FDR<0.05, Supplementary Figure S1). In conclusion, our  
202 data suggest that the microbial composition may be utilised as a correlate of disease severity.

203

## 204 **Metabolic modelling reveals distinct metabolic secretion capabilities of PD microbiomes**

205 To obtain insight into the possible functional consequence of observed microbiome  
206 changes in PD, we used metabolic modelling (cf. Methods). Briefly, we mapped each of the  
207 309 microbiome samples on the generic microbial community model consisting of 819 gut  
208 microbial reconstructions (Magnusdottir et al. 2017; Heinken et al. 2019) (cf. Supplementary  
209 Material) to derived personalised microbiome models (Baldini et al. 2018). We then computed  
210 a net maximal production capability (NMPC) for 129 different metabolites that could be  
211 secreted by each microbial community model (cf. Methods), providing thereby a  
212 characterisation of the differential microbial metabolic capabilities in PDs and controls. The  
213 secretion of nine metabolites had differential NMPCs in PD (Figure 4A, all FDR<0.05) as  
214 determined by multivariable regressions adjusting for age, sex, BMI, and technical covariates.

215 Moreover, although less dominant in comparison to the abundance data, PD-covariate  
216 interactions were also prevalent, with the uracil secretion potential showing a sex-specific  
217 effect and cysteine-glycine showing a BMI-dependent PD-effect (Figure 4B, 4C). In  
218 subsequent analyses, we tested for associations of the NMPCs with constipation, medication,  
219 disease duration, Hoehn-Yahr staging, NMS, and UPDRS III scores, complementing thereby  
220 the analyses on the abundance level. Notably, we found xanthine, D-alanine, L-lactic acid, D-  
221 ribose, and pantothenic acid positively associated with constipation (Figure 4B), while no  
222 NMPC was associated with medication or with disease duration. However, the pantothenic acid  
223 secretion potential was positively associated with higher NMS scores, interestingly both in PD  
224 and in controls (Figure 4D), while no NMPC survived correction for multiple testing regarding  
225 associations with the UPDRS III score and Hoehn-Yahr staging. To conclude, these results  
226 suggest that the altered microbial composition in PD could result in broad changes in metabolic  
227 capabilities, which manifested themselves additionally in non-motor symptoms and  
228 constipation.

229

### 230 **PD specific secretion profiles were altered due to changed community structure and** 231 **species abundances**

232 Next, we analysed which microbes contributed to the differential secretion profiles by  
233 correlating the NMPCs to the abundance data (Figure 4E/F, Supplementary Table 3). Six  
234 metabolite NMPCs had strong contribution or were even dominated by single genera (Figure  
235 4D), while for the other four NMPCs no single dominant genus could be identified. We then  
236 computed the contribution value of each genus to the production of each secreted metabolite  
237 (NMPC). From the aforementioned genera, which were associated on genus or species level  
238 with PD, only *Akkermansia*, *Acidaminococcus*, and *Roseburia* had substantial metabolic  
239 contributions (over 25%). *Acidaminococcus* was responsible for 64% of the variance in

240 cysteine-glycine production and *Roseburia* for 30% of the variance in uracil production  
 241 potential. *Akkermansia* impacted the secretion profiles the most and substantially contributed  
 242 to the metabolism of nine metabolites (Figure 4F), including the neurotransmitter gamma-  
 243 aminobutyric acid (GABA) and two sulphur species, being hydrogen sulphide and methionine.  
 244 GABA was also significantly altered between PD and controls on a nominal level missing FDR  
 245 corrected significance narrowly ( $b=0.18$ , 95%-CI:(0.06;0.30),  $p=0.003$ , FDR=0.0501). These  
 246 analyses demonstrate the added value of metabolic modelling to investigate altered metabolic  
 247 functions from the whole microbial composition.  
 248

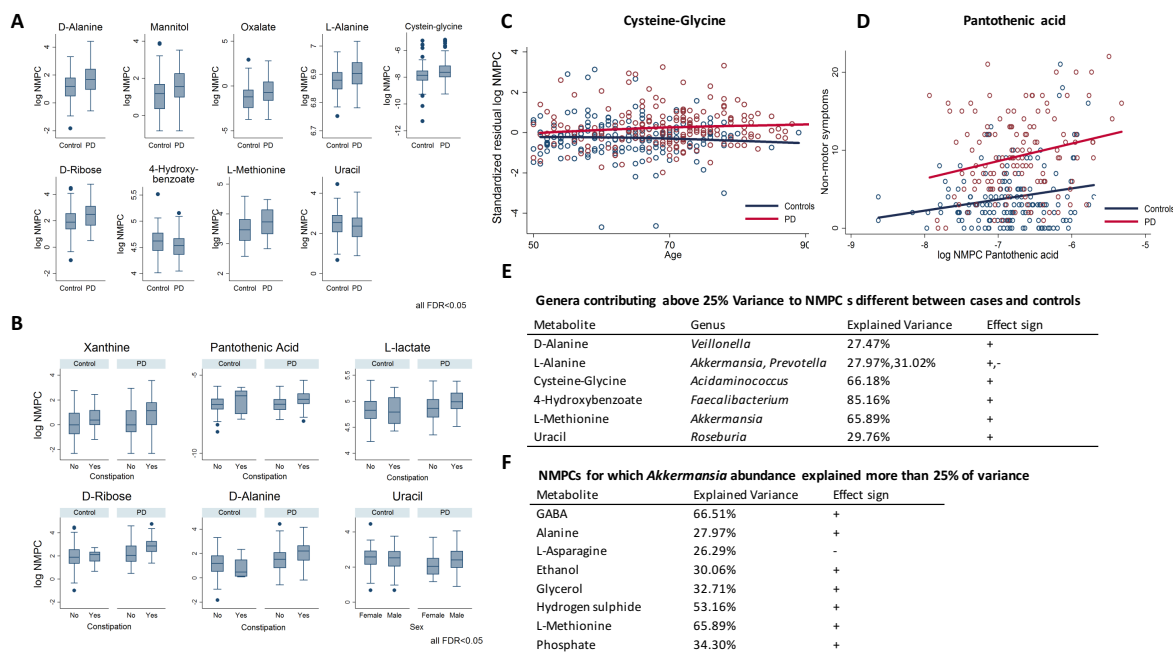

249  
 250 **Figure 4: Result of analysing secretion profiles of microbial communities.** **A.** Box plots for  
 251 NMPCs differential between cases and controls with FDR<0.05. **B.** NMPCs with sex-specific  
 252 PD signature or constipation effects (all FDR<0.05). **C.** Differential age trajectory between  
 253 cases and controls for cysteine-glycine ( $p<0.05$ ). **D.** Association of pantothenic acid with non-  
 254 motor symptoms. **E.** Genera contributing more than 25% to NMPCs different between cases  
 255 and controls. **F.** *Akkermansia* contribution to community production of 12 metabolites  
 256 expressed as a percentage of total production for each compound. Metabolites highlighted in

257 red were significantly increased in PD (FDR<0.05). NMPC=net maximal production capacity,  
258 GABA=gamma-aminobutyrate, H2S=hydrogen sulphide, FDR=false discovery rate. Effect  
259 sign “-“: negative correlation. Effect sign “+“: positive correlation.

260

## 261 **DISCUSSION**

262 In this study, we aimed to elucidate compositional and functional changes in the faecal  
263 microbiome of PD patients. Therefore, we analysed 16S rRNA data from a cohort of typical  
264 PD patients (n=147) and controls (n=162), and performed personalised microbial  
265 computational modelling. We identified i) eight genera and nine species that changed  
266 significantly in their relative abundances between PD patients and healthy controls. ii) PD-  
267 associated microbial patterns that were dependent on sex, age, BMI, constipation, and iii) in  
268 PD patients altered secretion potentials, particularly in sulphur metabolism, using metabolic  
269 modelling of microbial communities. Overall, our work demonstrated compositional and  
270 functional differences in the gut microbial communities of Parkinson’s disease patients  
271 providing novel experimentally testable hypothesis related to PD pathogenesis.

272 The microbial compositional analyses of our cohort identified significantly different  
273 microbial abundance distributions between PD patients and healthy controls (Table 1). Up to  
274 date, 13 studies have described altered colonic microbial compositions associated with PD and  
275 an overall picture starts to arise (Figure 5). For instance, the microbial the families of  
276 Verrucomicrobiaceae and Lactobacillaceae have been consistently found to have an increased  
277 abundance in PD (Figure 5). In accordance, our study also reports increased abundance in PD  
278 of Akkermansia, Christensenella, and Lactobacillus. Similarly, Bifidobacteria has also been  
279 repeatedly associated with PD (Figure 5) but in our study, we could show that the  
280 Bifidobacteria association dependent on constipation (Figure 3) highlighting the need for  
281 incorporating disease-specific phenotypes as covariates into the statistical design.

|                     |                     | Bedarf, 2017 | Barichella, 2019 | Hasegawa, 2015 | Heintz-Buschart, 2018 | Hill-Burns, 2017 | Hopfner, 2017 | Keshavarzian, 2015 | Li, 2017    | Lin, 2018 | Petrov, 2017 | Qian, 2018 | Scheperjans, 2015 | Unger, 2016 | Current study |
|---------------------|---------------------|--------------|------------------|----------------|-----------------------|------------------|---------------|--------------------|-------------|-----------|--------------|------------|-------------------|-------------|---------------|
| Study size          | PD cases            | 31*          | 193              | 52             | 76                    | 197              | 29            | 38                 | 14          | 75        | 89           | 45         | 72                | 34          | 147           |
|                     | Controls            | 28           | 191              | 36             | 78                    | 130              | 29            | 34                 | 24          | 45        | 66           | 45         | 72                | 34          | 162           |
| Method              | Shotgun             | x            |                  |                |                       |                  |               |                    |             |           |              |            |                   |             |               |
|                     | 16S rRNA (region)   |              | V3-V4            |                | V4                    | x                | V1-V2         | V4                 | V3-V4;V4-V5 | x         | V3-V4        | V3-V4      | V1-V3             |             | V3-V4         |
|                     | Quantitative PCR    |              |                  | x              |                       |                  |               |                    |             |           |              |            |                   | x           |               |
| Family              | Bacteroidaceae      |              |                  | b              |                       |                  |               |                    |             |           |              |            |                   |             |               |
|                     | Bifidobacteriaceae  |              |                  |                |                       |                  |               |                    |             |           | c            |            |                   |             |               |
|                     | Christensenellaceae |              |                  |                |                       |                  |               |                    |             |           | d            |            |                   |             | d             |
|                     | Clostridiaceae      |              |                  | e              |                       |                  |               |                    |             |           | f            | g          |                   |             | h             |
|                     | Comamonadaceae      |              |                  |                |                       |                  |               |                    |             |           |              | i          |                   |             |               |
|                     | Coriobacteriaceae   |              |                  |                |                       |                  |               |                    |             |           |              |            |                   |             |               |
|                     | Enterobacteriaceae  |              |                  |                |                       |                  |               |                    |             |           |              |            |                   |             |               |
|                     | Enterococcaceae     |              |                  |                |                       |                  |               |                    |             |           |              |            |                   |             |               |
|                     | Erysipelotrichaceae |              |                  |                |                       |                  |               |                    |             |           |              |            | j                 |             |               |
|                     | Lachnospiraceae     |              |                  |                |                       |                  |               |                    |             |           |              |            |                   |             |               |
|                     | Lactobacillaceae    |              |                  | k              |                       |                  |               |                    |             |           |              | k          |                   |             | k             |
|                     | Pasteurellaceae     |              |                  |                |                       |                  |               |                    |             |           |              |            |                   |             |               |
|                     | Prevotellaceae      |              |                  |                |                       |                  |               |                    |             |           |              |            |                   |             |               |
|                     | Ruminococcaceae     |              |                  |                |                       |                  |               |                    |             |           |              | l          |                   |             | m             |
|                     | Sphingomonadaceae   |              |                  |                |                       |                  |               |                    |             |           |              |            | n                 |             |               |
|                     | Streptococcaceae    |              |                  |                |                       |                  |               |                    |             |           |              |            |                   |             | o             |
| Verrucomicrobiaceae |                     | p            |                  |                | p                     |                  |               |                    |             |           |              |            |                   | p           |               |

282

283 **Figure 5: Reported microbial changes at the family level associated with PD in different**

284 **studies.** Only those bacterial families are shown, for which significant associations with

285 species or genera have been reported in at least two studies comparing stool samples from

286 patients and controls. Red - increased in PD, Blue - decreased in PD. a: *Actinomycetales*, b:

287 *Bacteroides fragilis*, c: *Bifidobacterium*, d: *Christensenella*, e: *Clostridium coccooides/ leptum*,

288 f: *Faecalibacterium*, *Dorea*, g: *Clostridium IV/XVIII*, *Butyricoccus*, *Anaerotruncus*, h:

289 *Anaerotruncus*, i: *Aquabacterium*, j: *Holdemania*, k: *Lactobacillus*, l: *Oscillospira*, m:

290 *Ruminococcus romii*, *Ruminococcus torques*, n: *Sphingomonas*, o: *Streptococcus*, p:

291 *Akkermansia*. \* Drug-naive, de novo PD patients only. Based on (Barichella et al. 2019).

292

293 At the same time, inconsistencies between the studies remain and they may be due to

294 differences in study design, inclusion criteria, faecal sampling, RNA extraction protocols, and

295 metagenomic and statistical methods. For instance, we used a relatively large, PD cohort while



296 Bedarf and colleagues (Bedarf et al. 2017) studied a small cohort of drug-naïve, male PD  
297 patients and male controls (Figure 5). Three studies included individuals of Chinese descent  
298 (Li et al. 2017; Lin et al. 2018; Qian et al. 2018) while the other studies focused on Caucasian  
299 individuals. It has been shown that microbial composition is associated with ethnic  
300 background, geography, and dietary habits (Turnbaugh et al. 2008; De Filippo et al. 2010;  
301 Yatsunenko et al. 2012), which may explain some of the discrepancies. The differences  
302 between the studies hence highlight the importance of performing meta-analysis to identify  
303 global microbial signatures, as it has been done for, e.g., colorectal cancer (Wirbel et al. 2019).  
304 Such meta-analysis may also permit to investigate subgroups of PD, as the number of cases  
305 and controls would be substantially increased and thus provide higher statistical power. For  
306 instance, we observed various effect modulators that were not reported before in humans (Table  
307 1), such as *Paraprevotella* abundance reduction being specific to women. This result is  
308 apparently in contradiction with findings from Bedarf and colleagues (Bedarf et al. 2017) who  
309 reported decreased levels of Prevotellaceae in a cohort of only male PD patients. However,  
310 once again, differences might be explained by different inclusion criteria, methodologies, and  
311 related possible sex-specific effects. Interestingly, a recent study reported a higher abundance  
312 of *Paraprevotella* in male mice compared to female mice (Huang et al. 2018). Despite the lack  
313 of extensive studies on gender-specific differences in microbiome composition, we suggest that  
314 machine learning procedures on microbiome data should be performed in a sex-stratified  
315 manner. Larger cohorts, e.g., through meta-analysis of published cohorts would allow the  
316 identification of generalizable microbial differences in PD patients and also, specific microbial  
317 changes associated with certain traits and physiological characteristics, as suggested by our  
318 data.

319 We could not detect an effect of the dopaminergic, PD specific medication on the  
320 microbiome composition, after correction for multiple testing. Also the fact that key findings



321 from the study of Bedarf and colleagues were reproduced in other cohorts of PD patients under  
322 medication, including ours, support that notion. Nonetheless, in previous studies, Dorea and  
323 Phascolarctobacterium genera have been negatively associated with levodopa equivalent doses  
324 (Qian et al. 2018) and members of the family of *Bacillaceae* have been correlated with  
325 levodopa treatment (Heintz-Buschart et al. 2018). Consequently, it cannot be excluded that  
326 medication is associated with microbial changes, albeit the association may be weaker than the  
327 effects of other covariates. As PD drugs are often taken in combinations, it would require a  
328 larger sample size than used in our study to permit the investigation of all possible drug  
329 combinations. The lack of clear association is somewhat expected as levodopa is absorbed in  
330 the upper part of the small intestine (Streubel et al. 2006) and thus small intestinal rather than  
331 large intestinal microbes may play a more prominent role in levodopa bioavailability.  
332 Consistently, a recent study showed that bacterial tyrosine decarboxylases restrict the  
333 bioavailability of levodopa (van Kessel et al. 2019). Interestingly, 193/818 reconstructed  
334 microbes (Magnusdottir et al. 2017), commonly found in the human gut, carry genes encoding  
335 for proteins that convert levodopa into dopamine (Noronha et al. 2019). Levodopa is always  
336 given with decarboxylase inhibitors, such as carbidopa or benserazide, targeting the human  
337 decarboxylases, but it cannot be excluded that they also act on the microbial counterpart.  
338 However, Van Kessel et al. have shown that carbidopa as well as benserazide is only a weak  
339 inhibitor of the microbial tyrosine decarboxylase (van Kessel et al. 2019).

340 We identified a positive association of *Bilophila* abundance with the Hoehn and Yahr  
341 staging, which captures motor impairment and disability independent of disease duration.  
342 Indeed, the abundance of *Bilophila* was not associate with disease duration, indicating mainly  
343 dependency on the progression of symptoms. This finding is consistent with experimental mice  
344 studies demonstrating the pro-inflammatory effect of *Bilophila* overgrowth (Devkota et al.  
345 2012; Natividad et al. 2018). Notably, the Hoehn and Yahr staging was also positively

346 associated on a nominal level with the predicted pyruvate secretion profile (Supplementary File  
347 4), which was accordingly significantly increased in PD patients on a nominal level alongside  
348 with L- and D-alanine. *Bilophila* has the rare capability to use taurine, an inhibitory  
349 neurotransmitter with neuroprotective effects (Saransaari and Oja 2007; Wu et al. 2009), as an  
350 energy source (Laue and Cook 2000). This pathway is initiated by the taurine: pyruvate  
351 aminotransferase (Laue and Cook 2000), converting pyruvate and taurine into L-alanine and  
352 sulfoacetaldehyde. The only microbe of the 818 species in our AGORA collection encoding  
353 the corresponding gene was *Bilophila*, which was significantly increased (FDR<0.05) and  
354 hence, the corresponding reaction (VMH ID: TAURPYRAT) was increased in abundance in  
355 PD microbiomes as well. In a previous study (Hertel et al. in revision), we have shown that  
356 blood taurine conjugated bile acids were positively associated with motor symptoms. *Bilophila*  
357 may be a marker of disease progression in PD, and it could modulate human sulphur  
358 metabolism through its taurine degradation capabilities. Alterations in sulphur metabolism  
359 have been already described when using computational modelling of microbiomes from a  
360 cohort of early diagnosed and levodopa naive PD patients (Bedarf et al. 2017; Hertel et al. in  
361 revision) as well as an increased concentration of methionine and derived metabolites in blood  
362 samples (Hertel et al. in revision). Furthermore, we and others have reported alterations in bile  
363 acids and taurine-conjugated bile acids in PD patients (Graham et al. 2018; Hertel et al. in  
364 revision). Our present study suggests again a key role of *Bilophila* in host-microbiome sulphur  
365 co-metabolism, which may link with bile acid metabolism.

366 Interestingly, an increased abundance of *B. wadsworthia* has been linked to constipation  
367 (Vandeputte et al. 2017). *B. wadsworthia* is the only microbe in the AGORA collection capable  
368 of the metabolic reaction converting pyruvate and taurine to L-alanine and sulphoacetaldehyde  
369 (VMH ID: TAURPYRAT). Therefore, an increased production of L-alanine might be due to  
370 the increased *B. wadsworthia* abundance. This resulting higher production rate of L-alanine

371 could then lead to an increased conversion into D-alanine via the alanine racemase (VMH ID:  
372 ALAR), which was present in 808/818 gut microbes in the AGORA collection. Accordingly,  
373 D-alanine was one of the three metabolite secretion profiles increased in constipated PD  
374 patients (Figure 4E). This hypothesis of *B. wadsworthia* playing a role in constipation of PD  
375 patients would need to be experimentally validated, especially since we could not find  
376 statistically significant changes in the association between the abundance of *B. wadsworthia*  
377 and constipated individuals. In contrast, we found an increase in *Bifidobacteria* abundance in  
378 constipated individuals and particularly in constipated PD patients. This result disagreed with  
379 an earlier study on individuals with chronic constipation, which reported a decrease in  
380 *Bifidobacteria* abundance (Khalif et al. 2005). Overall, the available data suggest that complex  
381 alterations in microbial composition are associated with constipation but may differ between  
382 diseases.

383         The mucin degrading microbe, *A. muciniphila*, represents about 1-4% of the faecal  
384 microbiome in humans (Naito et al. 2018). Numerous diseases have been associated with a  
385 decrease in *A. muciniphila* abundance (Schneeberger et al. 2015; Grander et al. 2018), while  
386 an increase has been consistently reported in PD patients (Figure 5). The *A. muciniphila*  
387 abundance had the largest contribution to the significantly altered metabolite secretion profiles  
388 (Figure 4E), including the neurotransmitter gamma-aminobutyric acid (GABA). While its  
389 predicted secretion potential was only nominally increased in PD patients the present study,  
390 higher GABA secretions rates have also been predicted based on microbiome data from early  
391 stage levodopa naive PD patients (Hertel et al. in revision). Importantly, GABA receptors have  
392 been found in the enteric nervous system, gut muscle, gut epithelial layers, and endocrine-like  
393 cells (Hyland and Cryan 2010) and its gut receptors are thought to be related to gastric motility  
394 (peristalsis), gastric emptying, and acid secretion (Hyland and Cryan 2010). Experiments with  
395 the GABA<sub>B</sub> agonist baclofen have shown that GABA<sub>B</sub> receptors can reduce gastric mobility

396 in the colon of rabbits (via cholinergic modulation) (Tonini et al. 1989). Interestingly, *A.*  
397 *muciniphila* has been shown to be positively associated with gastrointestinal transit time  
398 (Gobert et al. 2016; Vandeputte et al. 2016). GABA could reach the CNS via blood stream as  
399 a lipophilic compound, being able to pass the blood brain barrier. Additionally, microbial  
400 GABA could affect the brain-gut axis by contributing the human GABA pools, especially as it  
401 has been shown that the microbiome can affect GABA receptor density in the CNS via the  
402 vagus nerve (Bravo et al. 2011). To establish whether and which role *A. muciniphila* and GABA  
403 may play a role in prodromal PD, further experimental studies will be required.

404 In order to move beyond mere cataloguing of microbial changes associated with  
405 diseases, pathway-based tools (Abubucker et al. 2012) have been developed, in which  
406 microbial sequences (or reads) are mapped, e.g., onto KEGG ontologies present in the KEGG  
407 database (Kanehisa et al. 2017). Using such tools, Bedarf et al reported decreased glucuronate  
408 degradation and an increase in tryptophan degradation and formate conversion (Bedarf et al.  
409 2017). Similarly, Heinz-Buschart et al. reported 26 KEGG pathways to be altered in PD  
410 microbiomes (Heintz-Buschart et al. 2018). In our study, we complemented the compositional  
411 analysis with computational modelling to gain insight into potential functional, i.e., metabolic,  
412 consequences of changed microbe abundances in PD. The advantage of our approach is that  
413 the functional assignments may be more comprehensive than more canonical methods, such as  
414 KEGG ontologies because (1) the underlying genome-scale metabolic reconstructions have  
415 been assembled based on refined genome annotations and have been manually curated to  
416 ensure that the reaction and gene content is consistent with current knowledge about the  
417 microbe's physiology, and (2) each of these reconstructions, alone or in combinations, are  
418 amenable to metabolic modelling and thus functional and metabolic consequences of a changed  
419 environment (e.g., nutrients or other microbes in the models) can be computed. These

420 simulations are thus allowing to predict functional consequences and not only pathway or  
421 reaction enrichment, as typically done.

422

### 423 **Strength and limitation**

424 Here, we present microbiome analyses in a large population-based, monocentric case-  
425 control study on PD from a defined area (Figure 5). Capitalising on the overall clinical spectrum  
426 of PD of the LuxPark cohort, which reflects a representative sample of PD patients of different  
427 disease stages from a defined geographical area, we demonstrated that microbial composition  
428 is not only altered in PD but also that the observed associations of PD with changes in the  
429 composition of the microbiome should be interpreted in the context of age, sex, BMI, and  
430 constipation. This information is of importance for clinical translation, highlighting the need  
431 for both, (i) a personalised and (ii) a holistic approach, to understand the role of microbial  
432 communities in PD pathogenesis. In a second step targeting the potential functional changes  
433 related to PD-associated microbiomes, we performed metabolic modelling based on the  
434 AGORA collection (Magnusdottir et al. 2017) of genome-scale metabolic reconstructions,  
435 allowing for the predictions of metabolite secretion profiles. Thus, our analyses facilitated a  
436 detailed investigation of the altered metabolism of PD-related microbial communities in the  
437 gut, pointing towards a role of the known pro-inflammatory species *B. wadsworthia* interacting  
438 with the host on sulphur metabolism. Hence, metabolic modelling provides a valuable tool for  
439 deciphering the metabolic activity of microbial communities in PD.

440 However, despite the partial confirmation of previous results by our study (Table 5),  
441 several limitations should be kept in mind. First, certain covariates were not investigated, such  
442 as diet, exercise, and smoking. Whether these covariates alter the PD-specific signature is yet  
443 to be analysed. Although our study belongs to the three largest studies performed yet on PD,  
444 our sample size was still too small to deliver insights on combinations of drugs. Furthermore,

445 16S RNA sequencing, as applied in our study, is not allowing analyses on the strain level and  
446 may lead to misclassifications (Janda and Abbott 2007), and follow-up studies based on  
447 shotgun sequencing are needed to further corroborate our results. However, our results are  
448 notably well aligned with a previous shotgun sequencing study (Bedarf et al. 2017), which  
449 would further support a role of 16S RNA sequencing as a cost-efficient screening method.  
450 Being cross-sectional in nature, causal inference is not possible. Consequently, although  
451 metabolic modelling has been numerous times been shown to correctly predict attributes of  
452 living systems (Oberhardt et al. 2009; Aurich and Thiele 2016; Nielsen 2017), our hypothesis  
453 on the role of *B. wadsworthia* in PD interlinking sulphur metabolism with disease severity  
454 requires experimental validation. To conclude, by combining metabolic modelling with  
455 comprehensive statistical analyses, we identified a promising research target in PD and refined  
456 the understanding of PD-related microbial changes.

457

## 458 **METHODS**

### 459 **Description of the Luxembourg Parkinson's study**

460 For this study, data and biospecimen of the LuxPark cohort were utilised (Hipp et al.  
461 2018). The Luxembourg Parkinson's study includes a variegated group of patients with typical  
462 PD and atypical parkinsonism, and controls from Luxembourg and its neighbouring regions  
463 (Hipp et al. 2018). Controls were partly sampled among relatives of patients. The  
464 corresponding information on the family relation between controls and cases was not available.  
465 Cancer diagnosis with ongoing treatment, pregnancy, and secondary parkinsonism (drug-  
466 induced parkinsonism and parkinsonism in the frame of normotensive hydrocephalus) were  
467 exclusion criteria for enrolling in the patient or healthy control group. For 454 individuals  
468 (controls: n=248, PD: n=206) from the LuxPark cohort, stool samples were available and used  
469 for 16S RNA gene sequencing data (see below). Within LuxPark, controls were selected among

470 spouses of chosen patients and volunteers and individuals from other independent  
471 Luxembourgish studies (Crichton and Alkerwi 2014; Ruiz-Castell et al. 2016). As we aimed to  
472 target specifically typical PD (IPD), we excluded all individuals with age below 50 (controls:  
473 n=47, PD: n=9) and all individuals with an unclear status of PD diagnosis or an atypical PD  
474 diagnosis (PD: n=47). PD patients were defined as typical PD, according to the inclusion  
475 criteria by the United Kingdom Parkinson's Disease Society Brain Bank Clinical Diagnostic  
476 Criteria (Hughes et al. 1992). Furthermore, we excluded control patients with a United  
477 Parkinson's Disease Rating Scale (UPDRS) III score above ten, except for one control where  
478 the high UPDRS III score was caused by an arm injury. Furthermore, we excluded control  
479 persons who took dopaminergic medications (n=5), and individuals who reported to have taken  
480 antibiotics in the last six months (controls: n=20, PD: n=13). Note that excluded observations  
481 behave sub-additive, because of overlap between the exclusion criteria (i.e. individuals below  
482 age 50 and taking antibiotics). Finally, 309 individuals (controls: n=162, cases: n=147) were  
483 included in the statistical analyses.

484 All study participants gave written informed consents, and the study was performed in  
485 accordance with the Declaration of Helsinki. The LuxPark study (Hipp et al. 2018) was  
486 approved by the National Ethics Board (CNER Ref: 201407/13) and Data Protection  
487 Committee (CNPD Ref: 446/2017).

488

### 489 **Measurements and neuropsychiatric testing**

490 All patients and healthy controls were assessed by a neurologist, neuropsychologist or  
491 trained study nurse during the comprehensive battery of clinical assessment. Olfaction testing  
492 was conducted using the Sniffin' Sticks 16-item version (SS) within the LuxPark cohort (Hipp  
493 et al. 2018). Antibiotics usage was defined as intake of antibiotic within the previous six months  
494 to stool collection. For assessing PD-related motor and non-motor symptoms, the UPDRS



495 rating scales I-IV were used (Goetz et al. 2008). The severity of the disease was reflected by  
496 the Hoehn and Yahr staging (Hoehn and Yahr 1967). Non-motor symptoms were measured via  
497 the NMS questionnaire (Romenets et al. 2012). The use of medication was recorded, and PD-  
498 specific medication was classified into three classes, 1) levodopa, 2) dopamine receptor  
499 agonist, and 3) MAO-B/COMT inhibitors.

500

### 501 **Collection and processing of stool samples**

502 All samples were processed following standard operating procedures (Lehmann et al.  
503 2012; Mathay et al. 2015): stool samples were collected at home by patients using the  
504 OMNIgene.GUT stool tubes (DNA Genotek) and sent to the Integrated Biobank Luxembourg  
505 (IBBL) where one aliquot of 1 ml was used for DNA extraction. For the DNA extraction, a  
506 modified Chemagic DNA blood protocol was used with the MSM I instrument (PerkinElmer),  
507 the Chemagic Blood kit special 4 ml (Ref. CMG-1074) with a lysis buffer for faecal samples,  
508 and MSM I software. Samples were lysed using the SEB lysis buffer (included in the kit) and  
509 vortexed to obtain a homogenous suspension that was incubated for 10min at 70°C, then 5min  
510 at 95°C. Lysates (1.5mL) were centrifuged for five minutes at 10,000 g at RT. Supernatants  
511 were transferred to a 24XL deep-well plate. Plates were processed using the MSM I automated  
512 protocol.

513

### 514 **Analysis of the microbial composition with 16S rRNA gene sequencing**

515 The V3-V4 regions of the 16S rRNA were sequenced at IBBL using an Illumina  
516 Platform (Illumina MiSeq) using 2x300bp paired-end reads (Hipp et al. 2018). The gene-  
517 specific primers targeted the V3 - V4 regions of the 16S rRNA gene. These primers were  
518 designed with Illumina overhang adapters and used to amplify templates from genomic DNA.  
519 Amplicons were generated, cleaned, indexed, and sequenced according to the Illumina-



520 demonstrated 16S Metagenomic Sequencing Library Preparation Protocol with certain  
521 modifications. In brief, an initial PCR reaction contained at least 12.5 ng of DNA. A subsequent  
522 limited-cycle amplification step was performed to add multiplexing indices and Illumina  
523 sequencing adapters. Libraries were normalised, pooled, and sequenced on the Illumina MiSeq  
524 system using 2x300 bp paired-end reads.

525         The demultiplexed samples were processed merging forward and reverse reads and  
526 quality filtered using the dedicated pipeline "Merging and Filtering tool (MeFit)" (Parikh et al.  
527 2016) with default parameters. To obtain a reliable microbial identification, identification to  
528 both genus and species taxonomic level was obtained using the SPINGO (SPeCies level  
529 Identification of metaGenOmic amplicons) classifier (Allard et al. 2015) with default  
530 parameters. Relative abundances were computed, for each sample, using an R (R Foundation  
531 for Statistical Computing, Vienna, Austria) (Ihaka and Gentleman 1996) custom script. Briefly,  
532 for each sample, the counts of each genera/species were retrieved, and then the sum of the  
533 counts of all the genera/species was used to normalise to a total value of 1 each genera/species  
534 count.

535

### 536 **Personalised constraint-based modelling of microbial communities**

537         AGORA consists of a set of 819 strains of microbes commonly found in the human gut  
538 (Magnusdottir et al. 2017; Noronha et al. 2019). To match species taxonomic resolution, we  
539 combined strain models of the same species in one species model ('panSpeciesModel.m') using  
540 the function 'createPanModels.m' of the microbiome modelling toolbox (Baldini et al. 2018).  
541 Briefly, reactions of multiple strains are combined into one pan-reconstruction. The pan-  
542 biomass reaction is built from the average of all strain-specific biomass reactions. Microbial  
543 abundances were mapped onto a set of 646 species performing an automatic name matching  
544 between SPINGO species taxonomic assignment and panSpecies names. A threshold for

545 assessing the bacterial presence of a relative abundance value of 0.0001 was used to reduce the  
546 time of computations while limiting the order of magnitude simulations results of  
547 stoichiometric coefficients to ten. A total of 259 species overlapped between our set of species  
548 models and SPINGO species assignment when considering species identified at least in 10 %  
549 of samples (Supplementary Material). The retrieved microbial abundance information for each  
550 sample was integrated into a community modelling setup obtaining personalised microbiome  
551 models using the automated module of the microbiome modelling toolbox (Baldini et al. 2018)  
552 called mgPipe within the COBRA toolbox (Heirendt et al. 2019) (commit:  
553 b097185b641fc783fa6fea4900bdd303643a6a7e). Briefly, the metabolic models of the  
554 community members are connected by a common compartment, where each model can  
555 secrete/uptake metabolites. An average European diet was set as input for each microbiome  
556 model (Noronha et al. 2019). A community objective function was formulated based on the  
557 sum of each microbial model objective function and constrained to a lower bound of 0.4 per  
558 day and upper bound of one per day. A set of exchange reactions connects the shared  
559 compartment to the environment enabling to predict metabolite uptake and secretion flux rates  
560 (metabolic profiles/NMPCs) consistent with the applied constraints. The personalisation of  
561 each microbiome model was achieved by adjusting stoichiometric coefficients in the  
562 community biomass reactions to each sample's relative microbial abundance and removing  
563 species undetected from the community models.

564 Relative reactions abundances were calculated by summing the number of species  
565 having the reaction in a microbiome model and scaling the sum by the respective species  
566 relative abundance. Community metabolic profiles of these microbial communities were  
567 assessed using flux variability analysis on the exchange reactions (Gudmundsson and Thiele  
568 2010). AGORA microbial metabolic reconstructions used for the construction of the  
569 community models were downloaded from the VMH ([www.vmh.life](http://www.vmh.life), (Noronha et al. 2019)).

570 All computations were performed in MATLAB version 2018a (Mathworks, Inc.), using the  
571 IBM CPLEX (IBM, Inc.) solver through the Tomlab (Tomlab, Inc.) interface.

572

### 573 **Analyses of relative abundances**

574 For descriptive statistics, metric variables were described by means and standard  
575 deviations, while nominal variables were described by proportions. Missing values were not  
576 imputed, and the pattern of missing values was not assessable via the ADA platform (Hipp et  
577 al. 2018). The read counts for each metagenomic feature (e.g., genera and species) were divided  
578 by total read counts such that relative abundances were retrieved. Relative abundances were  
579 checked for outliers. Observations with more than four standard deviations from the mean were  
580 excluded from analyses. Only genera and species detected in more than 50% of all samples  
581 were included in the analyses, resulting in 62 genera and 127 species.

582

583 The metagenomic data was analysed using fractional regressions as developed by  
584 (Papke and Wooldridge 1996). Fractional regressions, first applied to econometric problems,  
585 are semiparametric methods designed to model fractional data without the need of specifying  
586 the distribution of the response variable. Fractional regressions are further inherently robust  
587 against heteroscedasticity and can be parametrised in odds ratios, delivering convenient  
588 interpretations of the regression coefficients. All statistical models included technical  
589 covariates, batch, total read counts, and unclassified read counts (reads for which a taxonomic  
590 assignment was not possible independently from any threshold of confidence estimate value  
591 used). The read count variables were included into the statistical model, as it has been shown  
592 that normalisation by division can introduce bias if certain statistical assumptions implied by  
593 the application of division are not fulfilled (Hertel et al. 2018). In the case of metagenomic  
594 data, the effect of read counts would be removed by division if the observations would be

595 sampled from a multinomial distribution. However, this is not a given as species and genera  
596 correlate amongst each other, violating the assumptions needed to construct multinomial  
597 distributions. In consequence, read count normalisation by division is prone to introduce a bias  
598 into metagenomic data; a potential bias, we corrected for by including the read counts as  
599 covariates into the model.

600 Before fitting the final statistical models, we explored the associations of basic  
601 covariates (age, sex, and BMI) with metagenomic features using fractional regressions as  
602 described above to avoid misspecifications of the statistical models. Since the data showed a  
603 high range in age and BMI, we checked for potential non-linear associations by including these  
604 variables into the models as restricted cubic splines (Harrell 2001) using three knots defined  
605 by the 5%-percentile, the median, and the 95%-percentile. As in the case for age, we found  
606 species with indications of non-linear age-associations with  $p < 0.01$ , age was modelled in all  
607 analyses via restricted cubic splines.

608 All p-values are reported two-tailed. Statistical analyses were performed in STATA  
609 14/MP (College Station, Texas, USA). Summary statistics of the performed analyses are given  
610 in the Supplementary files ‘Supplementary Tables’ 1-4.

611

## 612 **Differences between PD and controls in microbial composition and the influence of** 613 **covariates**

614 To analyse difference between genus abundances between PD and controls, fractional  
615 regressions were carried out with the relative abundance of the genus as the response variable,  
616 while including technical covariates, age (restricted cubic splines), sex, and BMI into the  
617 statistical modelling. The predictor of interest was the study group indicator variable. We  
618 corrected for multiple testing using the Benjamini-Hochberg procedure (Benjamini 2010) by  
619 setting the false discovery rate (FDR) to 0.05. Consequently, we corrected for 62 tests when

620 reporting genera results. These analyses were repeated analogously for the taxonomic level of  
621 species, while correcting for multiple testing via the FDR.

622         Next, we explored the possibility of statistical interactions between basic covariates  
623 (age, sex, and BMI) and the group indicator. For these analyses, we once again modelled age  
624 and BMI via restricted cubic splines allowing for non-linear interaction terms. We only tested  
625 two-way interaction terms. All interaction terms were introduced simultaneously into the  
626 statistical model and tested on significance via a Wald test (Harrell 2001), correcting for  
627 multiple testing via the FDR. For the globally significant test, the single interaction terms were  
628 investigated to explore which covariate-group interaction contributed to the overall  
629 significance. For interpretation, the interaction terms were visually inspected by plotting the  
630 predictions conditional on technical covariates. These analyses were then rerun with species  
631 abundances as response variable instead of genus abundances.

632         We assessed the influence of constipation on the microbial composition. We introduced  
633 the binary predictor constipation (yes/no) as additional predictor into the model and the  
634 corresponding group-constipation interaction term. Both terms were tested simultaneously on  
635 zero with a Wald test. The analyses were once again adjusted for technical covariates, age  
636 (restricted cubic splines), sex, and BMI, and we corrected for multiple testing via the FDR.

637

### 638 **Analyses of within PD phenotypes in relation to microbial composition**

639         We investigated the association pattern of medication and clinical features regarding  
640 the microbial composition. These analyses were only performed on the IPD cases, while  
641 controls were excluded from the analyses. First, we analysed the disease duration as measured  
642 in years between the date of the stool sampling and the year of the diagnosis. The analyses were  
643 conducted as before via fractional regressions with the genus abundances as the response  
644 variable, while adjusting for technical covariates, age (restricted cubic splines), sex, and BMI.

645 Then, we assessed in separate analyses the UPDRS III score as an indicator for motor  
646 symptoms, the non-motor symptoms as measured by the NMS, the Hoehn-Yahr staging of the  
647 disease as a global measure of disease progression, and the sniff-score. All these analyses were  
648 performed adjusted for technical covariates, age (restricted cubic splines), sex, BMI, and  
649 disease duration. Each of these series of regression represents 62 test, which was accounted for  
650 using the FDR. The impact of medication was analysed by examining three classes of  
651 medication, a) levodopa, b) mono-amino oxidase/catechol-O-methyltransferase inhibitors, and  
652 c) dopamine receptor agonists. We generated three corresponding binary phenotypes (intake/no  
653 intake) and added these three variables simultaneously to the statistical model determining the  
654 significance of this add-on via a Wald test. We then tested each medication-class in separate  
655 analyses, strictly correcting for multiple testing via the FDR (186 tests in total). The analyses  
656 were performed adjusted for technical covariates, age (restricted cubic splines), sex, BMI, and  
657 disease duration.

658

### 659 **Statistical analyses of fluxes**

660 The NMPCs were log transformed such that the skewness of the distribution was  
661 minimised (Box and Cox 1964)). This type of transformation was applied because of the very  
662 differently skewed distributions of the single NMPCs. Then, outliers were excluded using the  
663 4-SD outlier rule as before. Only fluxes with more than 50% non-zero values were retained in  
664 analyses. Furthermore, NMPCs with distributions not suitable for statistical analyses (e.g.,  
665 distributions with a high number of observations with exact the same numerical value) were  
666 excluded resulting in 129 NMPCs included into analyses.

667 The NMPCs were analysed with mixed linear regressions including the batch as random  
668 effects. Including the batch variable as a random effect has a higher statistical power in  
669 comparison to the fixed effect approach, but relies on more restrictive assumptions. We tested

670 the corresponding random effect assumption by Hausman specification tests and found no  
671 indications of violations of the Hausman specification test. Note that this possibility to account  
672 for batch effects via random effects is not available with fractional regressions where batch  
673 effects were corrected via fixed effects.

674 We performed the same analyses as with the metagenomic data, with the sole exception  
675 of replacing the fractional regression model with the linear mixed model. In all other aspects,  
676 the analyses followed the same scheme.

677

### 678 **Analyses of species contribution to fluxes**

679 To investigate the contribution of species and genera, we calculated for all included  
680 genera and all analysed fluxes the pairwise correlation and the corresponding variance  
681 contribution (the squared correlation). We classified every correlation above 0.5 (equal to 25%  
682 of variance contribution) as a strong correlation in accordance with classical classifications of  
683 effect size (Cohen 1988).

684

### 685 **Material availability**

686 All 16S rRNA sequences can be requested from I.T. (ines.thiele@nuigalway.ie). The  
687 mgPipe pipeline is available within the COBRA toolbox  
688 (<https://github.com/opencobra/cobratoolbox>), and the custom scripts with related  
689 documentation are available at the GitHub repository:  
690 [https://github.com/ThieleLab/CodeBase/ND\\_collect](https://github.com/ThieleLab/CodeBase/ND_collect).

691

### 692 **Acknowledgment**

693 This study was funded by grants from the Luxembourg National Research Fund (FNR)  
694 within the National Centre of Excellence in Research (NCER) on Parkinson's disease (FNR/



695 NCER13/BM/11264123) and the PEARL programme (FNR/P13/6682797 to RK), by  
696 European Union's Horizon 2020 research and innovation programme grant agreement  
697 No 692320 to RK, and by the European Research Council (ERC) under the European Union's  
698 Horizon 2020 research and innovation programme (grant agreement No 757922) to IT.

699

## 700 References

- 701 Abubucker S, Segata N, Goll J, Schubert AM, Izard J, Cantarel BL, Rodriguez-Mueller B,  
702 Zucker J, Thiagarajan M, Henrissat B et al. 2012. Metabolic reconstruction for  
703 metagenomic data and its application to the human microbiome. *PLoS Comput Biol*  
704 **8**: e1002358.
- 705 Allard G, Ryan FJ, Jeffery IB, Claesson MJ. 2015. SPINGO: a rapid species-classifier for  
706 microbial amplicon sequences. *BMC Bioinformatics* **16**: 324.
- 707 Aurich MK, Thiele I. 2016. Computational Modeling of Human Metabolism and Its Application  
708 to Systems Biomedicine. *Methods in molecular biology (Clifton, NJ)* **1386**: 253-281.
- 709 Baldini F, Heinken A, Heirendt L, Magnusdottir S, Fleming RMT, Thiele I. 2018. The  
710 Microbiome Modeling Toolbox: from microbial interactions to personalized microbial  
711 communities. *Bioinformatics (Oxford, England)* doi:10.1093/bioinformatics/bty941.
- 712 Barichella M, Severgnini M, Cilia R, Cassani E, Bolliri C, Caronni S, Ferri V, Canello R,  
713 Ceccarani C, Faierman S et al. 2019. Unraveling gut microbiota in Parkinson's  
714 disease and atypical parkinsonism. *Movement disorders : official journal of the*  
715 *Movement Disorder Society* **34**: 396-405.
- 716 Bedarf JR, Hildebrand F, Coelho LP, Sunagawa S, Bahram M, Goeser F, Bork P, Wullner U.  
717 2017. Functional implications of microbial and viral gut metagenome changes in early  
718 stage L-DOPA-naive Parkinson's disease patients. *Genome Med* **9**: 39.
- 719 Benjamini Y. 2010. Discovering the false discovery rate. *Journal of the Royal Statistical*  
720 *Society, Statistical Methodology, Series B* **72**: 405-416.
- 721 Bonifati V, Rizzu P, Squitieri F, Krieger E, Vanacore N, van Swieten JC, Brice A, van Duijn  
722 CM, Oostra B, Meco G et al. 2003. DJ-1( PARK7), a novel gene for autosomal  
723 recessive, early onset parkinsonism. *Neurological sciences : official journal of the*  
724 *Italian Neurological Society and of the Italian Society of Clinical Neurophysiology* **24**:  
725 159-160.
- 726 Box GEP, Cox DR. 1964. An Analysis of Transformations. *Statistical Methodology Series B*  
727 **26**: 211-243.
- 728 Bravo JA, Forsythe P, Chew MV, Escaravage E, Savignac HM, Dinan TG, Bienenstock J,  
729 Cryan JF. 2011. Ingestion of Lactobacillus strain regulates emotional behavior and  
730 central GABA receptor expression in a mouse via the vagus nerve. *Proceedings of*  
731 *the National Academy of Sciences of the United States of America* **108**: 16050-  
732 16055.
- 733 Carabotti M, Scirocco A, Maselli MA, Severi C. 2015. The gut-brain axis: interactions  
734 between enteric microbiota, central and enteric nervous systems. *Ann Gastroenterol*  
735 **28**: 203-209.
- 736 Cersosimo MG, Raina GB, Pecci C, Pellene A, Calandra CR, Gutierrez C, Micheli FE,  
737 Benarroch EE. 2013. Gastrointestinal manifestations in Parkinson's disease:  
738 prevalence and occurrence before motor symptoms. *J Neurol* **260**: 1332-1338.
- 739 Cohen J. 1988. *Statistical Power Analysis for the Behavioral Sciences*. Routledge.
- 740 Crichton GE, Alkerwi A. 2014. Association of sedentary behavior time with ideal  
741 cardiovascular health: the ORISCAV-LUX study. *PLoS One* **9**: e99829.



- 742 De Filippo C, Cavalieri D, Di Paola M, Ramazzotti M, Poullet JB, Massart S, Collini S,  
743 Pieraccini G, Lionetti P. 2010. Impact of diet in shaping gut microbiota revealed by a  
744 comparative study in children from Europe and rural Africa. *Proceedings of the*  
745 *National Academy of Sciences of the United States of America* **107**: 14691-14696.
- 746 Devkota S, Wang Y, Musch MW, Leone V, Fehlner-Peach H, Nadimpalli A, Antonopoulos  
747 DA, Jabri B, Chang EB. 2012. Dietary-fat-induced taurocholic acid promotes  
748 pathobiont expansion and colitis in Il10<sup>-/-</sup> mice. *Nature* **487**: 104-108.
- 749 Di Fonzo A, Dekker MC, Montagna P, Baruzzi A, Yonova EH, Correia Guedes L,  
750 Szczerbinska A, Zhao T, Dubbel-Hulsman LO, Wouters CH et al. 2009. FBXO7  
751 mutations cause autosomal recessive, early-onset parkinsonian-pyramidal syndrome.  
752 *Neurology* **72**: 240-245.
- 753 Fasano A, Visanji NP, Liu LW, Lang AE, Pfeiffer RF. 2015. Gastrointestinal dysfunction in  
754 Parkinson's disease. *Lancet Neurol* **14**: 625-639.
- 755 Gatto NM, Rhodes SL, Manthripragada AD, Bronstein J, Cockburn M, Farrer M, Ritz B.  
756 2010. alpha-Synuclein gene may interact with environmental factors in increasing risk  
757 of Parkinson's disease. *Neuroepidemiology* **35**: 191-195.
- 758 Gobert AP, Sagrestani G, Delmas E, Wilson KT, Verriere TG, Dapoigny M, Del'homme C,  
759 Bernalier-Donadille A. 2016. The human intestinal microbiota of constipated-  
760 predominant irritable bowel syndrome patients exhibits anti-inflammatory properties.  
761 *Scientific reports* **6**: 39399.
- 762 Goetz CG, Tilley BC, Shaftman SR, Stebbins GT, Fahn S, Martinez-Martin P, Poewe W,  
763 Sampaio C, Stern MB, Dodel R et al. 2008. Movement Disorder Society-sponsored  
764 revision of the Unified Parkinson's Disease Rating Scale (MDS-UPDRS): scale  
765 presentation and clinimetric testing results. *Movement disorders : official journal of*  
766 *the Movement Disorder Society* **23**: 2129-2170.
- 767 Graham SF, Rey NL, Ugur Z, Yilmaz A, Sherman E, Maddens M, Bahado-Singh RO, Becker  
768 K, Schulz E, Meyerdirk LK et al. 2018. Metabolomic Profiling of Bile Acids in an  
769 Experimental Model of Prodromal Parkinson's Disease. *Metabolites* **8**.
- 770 Grander C, Adolph TE, Wieser V, Lowe P, Wrzosek L, Gyongyosi B, Ward DV, Grabherr F,  
771 Gerner RR, Pfister A et al. 2018. Recovery of ethanol-induced Akkermansia  
772 muciniphila depletion ameliorates alcoholic liver disease. *Gut* **67**: 891-901.
- 773 Gudmundsson S, Thiele I. 2010. Computationally efficient flux variability analysis. *BMC*  
774 *Bioinformatics* **11**: 489.
- 775 Harrell FE. 2001. In *Regression modeling strategies*, (ed. FE Harrell). Springer, New York,  
776 USA.
- 777 Hasegawa S, Goto S, Tsuji H, Okuno T, Asahara T, Nomoto K, Shibata A, Fujisawa Y,  
778 Minato T, Okamoto A et al. 2015. Intestinal Dysbiosis and Lowered Serum  
779 Lipopolysaccharide-Binding Protein in Parkinson's Disease. *PLoS One* **10**:  
780 e0142164.
- 781 Heinken A, Ravcheev DA, Baldini F, Heirendt L, Fleming RMT, Thiele I. 2019. Personalized  
782 modeling of the human gut microbiome reveals distinct bile acid deconjugation and  
783 biotransformation potential in healthy and IBD individuals. *Microbiome* **7**: 75.
- 784 Heinken A, Thiele I. 2015. Anoxic Conditions Promote Species-Specific Mutualism between  
785 Gut Microbes In Silico. *Applied and environmental microbiology* **81**: 4049-4061.
- 786 Heintz-Buschart A, Pandey U, Wicke T, Sixel-Doring F, Janzen A, Sittig-Wiegand E,  
787 Trenkwalder C, Oertel WH, Mollenhauer B, Wilmes P. 2018. The nasal and gut  
788 microbiome in Parkinson's disease and idiopathic rapid eye movement sleep  
789 behavior disorder. *Movement disorders : official journal of the Movement Disorder*  
790 *Society* **33**: 88-98.
- 791 Heirendt L, Arreckx S, Pfau T, Mendoza SN, Richelle A, Heinken A, Haraldsdottir HS,  
792 Wachowiak J, Keating SM, Vlasov V et al. 2019. Creation and analysis of  
793 biochemical constraint-based models using the COBRA Toolbox v.3.0. *Nature*  
794 *protocols* **14**: 639-702.
- 795 Hertel J, Harms AC, Heinken A, Baldini F, Thinnes CC, Glaab E, Vasco D, Trenkwalder C,  
796 Krüger R, Hankemeier T et al. in revision. Integrated Analyses of Microbiome and

- 797 Longitudinal Metabolome Data Reveal Microbial-Host Interactions on Sulfur  
798 Metabolism in Parkinson's Disease.
- 799 Hertel J, Rotter M, Frenzel S, Zacharias HU, Krumsiek J, Rathkolb B, Hrabe de Angelis M,  
800 Rabstein S, Pallapies D, Bruning T et al. 2018. Dilution correction for dynamically  
801 influenced urinary analyte data. *Anal Chim Acta* **1032**: 18-31.
- 802 Hill-Burns EM, Debelius JW, Morton JT, Wissemann WT, Lewis MR, Wallen ZD, Peddada  
803 SD, Factor SA, Molho E, Zabetian CP et al. 2017. Parkinson's disease and  
804 Parkinson's disease medications have distinct signatures of the gut microbiome.  
805 *Movement disorders : official journal of the Movement Disorder Society* **32**: 739-749.
- 806 Hipp G, Vaillant M, Diederich NJ, Roomp K, Satagopam VP, Banda P, Sandt E, Mommaerts  
807 K, Schmitz SK, Longhino L et al. 2018. The Luxembourg Parkinson's Study: A  
808 Comprehensive Approach for Stratification and Early Diagnosis. *Front Aging*  
809 *Neurosci* **10**: 326.
- 810 Hoehn MM, Yahr MD. 1967. Parkinsonism: onset, progression and mortality. *Neurology* **17**:  
811 427-442.
- 812 Hopfner F, Kunstner A, Muller SH, Kunzel S, Zeuner KE, Margraf NG, Deuschl G, Baines  
813 JF, Kuhlenbaumer G. 2017. Gut microbiota in Parkinson disease in a northern  
814 German cohort. *Brain research* **1667**: 41-45.
- 815 Huang R, Li T, Ni J, Bai X, Gao Y, Li Y, Zhang P, Gong Y. 2018. Different Sex-Based  
816 Responses of Gut Microbiota During the Development of Hepatocellular Carcinoma  
817 in Liver-Specific Tsc1-Knockout Mice. *Front Microbiol* **9**: 1008.
- 818 Hughes AJ, Daniel SE, Kilford L, Lees AJ. 1992. Accuracy of clinical diagnosis of idiopathic  
819 Parkinson's disease: a clinico-pathological study of 100 cases. *J Neurol Neurosurg*  
820 *Psychiatry* **55**: 181-184.
- 821 Hyland NP, Cryan JF. 2010. A Gut Feeling about GABA: Focus on GABA(B) Receptors.  
822 *Front Pharmacol* **1**: 124.
- 823 Ihaka R, Gentleman R. 1996. R: A Language for Data Analysis and Graphics. *Journal of*  
824 *Computational and Graphical Statistics* **5**: 299-314.
- 825 Janda JM, Abbott SL. 2007. 16S rRNA gene sequencing for bacterial identification in the  
826 diagnostic laboratory: pluses, perils, and pitfalls. *J Clin Microbiol* **45**: 2761-2764.
- 827 Kalia LV, Lang AE, Hazrati LN, Fujioka S, Wszolek ZK, Dickson DW, Ross OA, Van Deerlin  
828 VM, Trojanowski JQ, Hurtig HI et al. 2015. Clinical correlations with Lewy body  
829 pathology in LRRK2-related Parkinson disease. *JAMA Neurol* **72**: 100-105.
- 830 Kanehisa M, Furumichi M, Tanabe M, Sato Y, Morishima K. 2017. KEGG: new perspectives  
831 on genomes, pathways, diseases and drugs. *Nucleic Acids Res* **45**: D353-D361.
- 832 Keshavarzian A, Green SJ, Engen PA, Voigt RM, Naqib A, Forsyth CB, Mutlu E, Shannon  
833 KM. 2015. Colonic bacterial composition in Parkinson's disease. *Movement disorders*  
834 *: official journal of the Movement Disorder Society* **30**: 1351-1360.
- 835 Khalif IL, Quigley EM, Konovitch EA, Maximova ID. 2005. Alterations in the colonic flora and  
836 intestinal permeability and evidence of immune activation in chronic constipation. *Dig*  
837 *Liver Dis* **37**: 838-849.
- 838 Kitada T, Asakawa S, Hattori N, Matsumine H, Yamamura Y, Minoshima S, Yokochi M,  
839 Mizuno Y, Shimizu N. 1998. Mutations in the parkin gene cause autosomal recessive  
840 juvenile parkinsonism. *Nature* **392**: 605-608.
- 841 Klitgord N, Segre D. 2010. Environments that induce synthetic microbial ecosystems. *PLoS*  
842 *Comput Biol* **6**: e1001002.
- 843 Laue H, Cook AM. 2000. Biochemical and molecular characterization of taurine:pyruvate  
844 aminotransferase from the anaerobe *Bilophila wadsworthia*. *Eur J Biochem* **267**:  
845 6841-6848.
- 846 Lehmann S, Guadagni F, Moore H, Ashton G, Barnes M, Benson E, Clements J, Koppandi I,  
847 Coppola D, Demiroglu SY et al. 2012. Standard preanalytical coding for  
848 biospecimens: review and implementation of the Sample PREanalytical Code  
849 (SPREC). *Biopreserv Biobank* **10**: 366-374.
- 850 Lesser GT. 2002. Frequency of bowel movements and future risk of Parkinson's disease.  
851 *Neurology* **58**: 838; author reply 838-839.

- 852 Li W, Wu X, Hu X, Wang T, Liang S, Duan Y, Jin F, Qin B. 2017. Structural changes of gut  
853 microbiota in Parkinson's disease and its correlation with clinical features. *Sci China*  
854 *Life Sci* **60**: 1223-1233.
- 855 Lin A, Zheng W, He Y, Tang W, Wei X, He R, Huang W, Su Y, Huang Y, Zhou H et al. 2018.  
856 Gut microbiota in patients with Parkinson's disease in southern China. *Parkinsonism*  
857 *Relat Disord* **53**: 82-88.
- 858 Magnúsdóttir S, Heinken A, Kutt L, Ravcheev DA, Bauer E, Noronha A, Greenhalgh K, Jager  
859 C, Baginska J, Wilmes P et al. 2017. Generation of genome-scale metabolic  
860 reconstructions for 773 members of the human gut microbiota. *Nat Biotechnol* **35**: 81-  
861 89.
- 862 Mathay C, Hamot G, Henry E, Georges L, Bellora C, Lebrun L, de Witt B, Ammerlaan W,  
863 Buschart A, Wilmes P et al. 2015. Method optimization for fecal sample collection  
864 and fecal DNA extraction. *Biopreserv Biobank* **13**: 79-93.
- 865 Naito Y, Uchiyama K, Takagi T. 2018. A next-generation beneficial microbe: Akkermansia  
866 muciniphila. *J Clin Biochem Nutr* **63**: 33-35.
- 867 Natividad JM, Lamas B, Pham HP, Michel ML, Rainteau D, Bridonneau C, da Costa G, van  
868 Hylckama Vlieg J, Sovran B, Chamignon C et al. 2018. Bilophila wadsworthia  
869 aggravates high fat diet induced metabolic dysfunctions in mice. *Nat Commun* **9**:  
870 2802.
- 871 Nielsen J. 2017. Systems Biology of Metabolism: A Driver for Developing Personalized and  
872 Precision Medicine. *Cell metabolism* **25**: 572-579.
- 873 Noronha A, Modamio J, Jarosz Y, Guerard E, Sompairac N, Preciat G, Danielsdóttir AD,  
874 Krecke M, Merten D, Haraldsdóttir HS et al. 2019. The Virtual Metabolic Human  
875 database: integrating human and gut microbiome metabolism with nutrition and  
876 disease. *Nucleic Acids Res* **47**: D614-D624.
- 877 Oberhardt MA, Palsson BO, Papin JA. 2009. Applications of genome-scale metabolic  
878 reconstructions. *Molecular systems biology* **5**: 320.
- 879 Orth JD, Thiele I, Palsson BO. 2010. What is flux balance analysis? *Nat Biotechnol* **28**: 245-  
880 248.
- 881 Paisan-Ruiz C, Jain S, Evans EW, Gilks WP, Simon J, van der Brug M, Lopez de Munain A,  
882 Aparicio S, Gil AM, Khan N et al. 2004. Cloning of the gene containing mutations that  
883 cause PARK8-linked Parkinson's disease. *Neuron* **44**: 595-600.
- 884 Papke LE, Wooldridge JM. 1996. Econometric methods for fractional response variables  
885 with an application to 401(k) plan participation rates. *Journal of Applied Econometrics*  
886 **11**: 619-632.
- 887 Parikh HI, Koparde VN, Bradley SP, Buck GA, Sheth NU. 2016. MeFIT: merging and filtering  
888 tool for illumina paired-end reads for 16S rRNA amplicon sequencing. *BMC*  
889 *Bioinformatics* **17**: 491.
- 890 Petrov VA, Saltykova IV, Zhukova IA, Alifirova VM, Zhukova NG, Dorofeeva YB, Tyakht AV,  
891 Kovarsky BA, Alekseev DG, Kostyukova ES et al. 2017. Analysis of Gut Microbiota  
892 in Patients with Parkinson's Disease. *Bull Exp Biol Med* **162**: 734-737.
- 893 Qian Y, Yang X, Xu S, Wu C, Song Y, Qin N, Chen SD, Xiao Q. 2018. Alteration of the fecal  
894 microbiota in Chinese patients with Parkinson's disease. *Brain Behav Immun* **70**:  
895 194-202.
- 896 Romenets SR, Wolfson C, Galatas C, Pelletier A, Altman R, Wadup L, Postuma RB. 2012.  
897 Validation of the non-motor symptoms questionnaire (NMS-Quest). *Parkinsonism*  
898 *Relat Disord* **18**: 54-58.
- 899 Ruiz-Castell M, Kandala NB, Kuemmerle A, Schritz A, Barre J, Delagardelle C, Kripler S,  
900 Schmit JC, Stranges S. 2016. Hypertension burden in Luxembourg: Individual risk  
901 factors and geographic variations, 2013 to 2015 European Health Examination  
902 Survey. *Medicine (Baltimore)* **95**: e4758.
- 903 Sampson TR, Debelius JW, Thron T, Janssen S, Shastri GG, Ilhan ZE, Challis C, Schretter  
904 CE, Rocha S, Gradinaru V et al. 2016. Gut Microbiota Regulate Motor Deficits and  
905 Neuroinflammation in a Model of Parkinson's Disease. *Cell* **167**: 1469-1480 e1412.

- 906 Saransaari P, Oja SS. 2007. Taurine release in mouse brain stem slices under cell-  
907 damaging conditions. *Amino acids* **32**: 439-446.
- 908 Savica R, Carlin JM, Grossardt BR, Bower JH, Ahlskog JE, Maraganore DM, Bharucha AE,  
909 Rocca WA. 2009. Medical records documentation of constipation preceding  
910 Parkinson disease: A case-control study. *Neurology* **73**: 1752-1758.
- 911 Scheperjans F, Aho V, Pereira PA, Koskinen K, Paulin L, Pekkonen E, Haapaniemi E,  
912 Kaakkola S, Eerola-Rautio J, Pohja M et al. 2015. Gut microbiota are related to  
913 Parkinson's disease and clinical phenotype. *Movement disorders : official journal of*  
914 *the Movement Disorder Society* **30**: 350-358.
- 915 Schneeberger M, Everard A, Gomez-Valades AG, Matamoros S, Ramirez S, Delzenne NM,  
916 Gomis R, Claret M, Cani PD. 2015. Akkermansia muciniphila inversely correlates  
917 with the onset of inflammation, altered adipose tissue metabolism and metabolic  
918 disorders during obesity in mice. *Scientific reports* **5**: 16643.
- 919 Sleator RD. 2010. The human superorganism - of microbes and men. *Med Hypotheses* **74**:  
920 214-215.
- 921 Streubel A, Siepmann J, Bodmeier R. 2006. Drug delivery to the upper small intestine  
922 window using gastroretentive technologies. *Current opinion in pharmacology* **6**: 501-  
923 508.
- 924 Thiele I, Sahoo S, Heinken A, Heirendt L, Aurich MK, Noronha A, Fleming RMT. 2018.  
925 Personalized whole-body models integrate metabolism, physiology, and the gut  
926 microbiome. *BioRxiv preprint* doi:10.1101/255885.
- 927 Tonini M, Crema A, Frigo GM, Rizzi CA, Manzo L, Candura SM, Onori L. 1989. An in vitro  
928 study of the relationship between GABA receptor function and propulsive motility in  
929 the distal colon of the rabbit. *British journal of pharmacology* **98**: 1109-1118.
- 930 Turnbaugh PJ, Backhed F, Fulton L, Gordon JI. 2008. Diet-induced obesity is linked to  
931 marked but reversible alterations in the mouse distal gut microbiome. *Cell Host*  
932 *Microbe* **3**: 213-223.
- 933 van Kessel SP, Frye AK, El-Gendy AO, Castejon M, Keshavarzian A, van Dijk G, El Aidy S.  
934 2019. Gut bacterial tyrosine decarboxylases restrict levels of levodopa in the  
935 treatment of Parkinson's disease. *Nat Commun* **10**: 310.
- 936 Vandeputte D, Falony G, Vieira-Silva S, Tito RY, Joossens M, Raes J. 2016. Stool  
937 consistency is strongly associated with gut microbiota richness and composition,  
938 enterotypes and bacterial growth rates. *Gut* **65**: 57-62.
- 939 Vandeputte D, Falony G, Vieira-Silva S, Wang J, Sailer M, Theis S, Verbeke K, Raes J.  
940 2017. Prebiotic inulin-type fructans induce specific changes in the human gut  
941 microbiota. *Gut* **66**: 1968-1974.
- 942 Wirbel J, Pyl PT, Kartal E, Zych K, Kashani A, Milanese A, Fleck JS, Voigt AY, Palleja A,  
943 Ponnudurai R et al. 2019. Meta-analysis of fecal metagenomes reveals global  
944 microbial signatures that are specific for colorectal cancer. *Nat Med* **25**: 679-689.
- 945 Wu JY, Wu H, Jin Y, Wei J, Sha D, Prentice H, Lee HH, Lin CH, Lee YH, Yang LL. 2009.  
946 Mechanism of neuroprotective function of taurine. *Adv Exp Med Biol* **643**: 169-179.
- 947 Yatsunenkov T, Rey FE, Manary MJ, Trehan I, Dominguez-Bello MG, Contreras M, Magris M,  
948 Hidalgo G, Baldassano RN, Anokhin AP et al. 2012. Human gut microbiome viewed  
949 across age and geography. *Nature* **486**: 222-227.
- 950
